# Supplementary material for: daughterlesscoordinates somatic cell proliferation, differentiation and germline cyst survival during follicle formation inDrosophila
Source: Oxford University Press journal article supplement (doi:10.1242/dev.129.13.3255), 2002-07-01
Supplement: 3255sup.pdf [file 3255sup.pdf]

## Supplemental Table. Vital Acridine Orange staining of germaria

| Genotype                                                                  | Days after eclosion | % Acridine Orange-positive germaria |                     |
|---------------------------------------------------------------------------|---------------------|-------------------------------------|---------------------|
|                                                                           |                     | Overall                             | By female           |
| Wild-type: OregonR                                                        | 4-6                 | 85.5 ( $n=269$ )                    | 85.5±1.6 ( $n=10$ ) |
| Wild-type: OregonR                                                        | 2-4                 | 59.4 ( $n=308$ )                    | 59.2±2.6 ( $n=10$ ) |
| Wild-type: CantonS                                                        | 2-4                 | 69.3 ( $n=381$ )                    | 69.4±2.2 ( $n=10$ ) |
| Wild-type: <i>white</i> <sup>1118</sup>                                   | 4-6                 | 61.9 ( $n=63$ )                     | 61.9±2.6 ( $n=2$ )  |
| Wild-type: <i>white</i> <sup>1118</sup>                                   | 2-4                 | 51.5 ( $n=297$ )                    | 51.2±2.9 ( $n=10$ ) |
| <i>da</i> <sup>7</sup> / <i>da</i> <sup>s22</sup>                         | 2-4                 | 4.2 ( $n=356$ )                     | 4.1±1.2 ( $n=11$ )  |
| <i>da</i> <sup>7</sup> /CyO sisters                                       | 2-4                 | 61.7 ( $n=334$ )                    | 61.4±3.0 ( $n=10$ ) |
| <i>da</i> <sup>ls<sup>h</sup></sup> / <i>da</i> <sup>ls<sup>h</sup></sup> | 2-4                 | 13.1 ( $n=252$ )                    | 13.2±2.0 ( $n=10$ ) |
| <i>da</i> <sup>ls<sup>h</sup></sup> /CyO sisters                          | 2-4                 | 82.4 ( $n=335$ )                    | 82.1±3.3 ( $n=10$ ) |

### FLY FOOD RECIPES

#### Yeast-agar-dextrose medium

(Source: Carpenter, J. M. (1950). A new semisynthetic food medium for *Drosophila*. *Dros. Inf. Serv.* **24**, 96-97.)

100 g Brewer's yeast

30 g Agar

200 g Dextrose

2 g K<sub>2</sub>HPO<sub>4</sub>

Mix dry ingredients and add:

1.6 l Water

50 ml Solution X (20 mg/ml CaCl<sub>2</sub>)

50 ml Solution Y (20 mg/ml FeSO<sub>4</sub>·7H<sub>2</sub>O)

50 ml Solution Z (16 g potassium sodium tartrate, 1 g NaCl, 1 g MnCl<sub>2</sub>·4H<sub>2</sub>O in 0.3 l)

Stir, autoclave for 5-25 minutes, allow to cool enough that when swirled will not boil over, and then add:

20 ml Tegosept solution (10% (w/v) methyl p-hydrobenzoate in 95% ethanol)

Pour vials.

#### Molasses-cornmeal-yeast medium

(Source: Applied Scientific, *Violet's Tasty Treats*)

1 l Molasses (unsulfured)

14 l Water

148 g Agar

1 l Corn meal

412 g Baker's yeast

225 ml Tegosept solution (10% (w/v) methyl p-hydrobenzoate in 95% ethanol)

80 ml Propionic acid

#### Instructions for steam kettle

1. Add molasses and hot water to the kettle and turn on steam.
2. Measure and mix together the dry ingredients.
3. Turn on stirrer in the kettle, and add mixed dry ingredients.
4. Bring the mixture to a boil.
5. Turn down the steam halfway and boil for 10 minutes.
6. Turn off the steam and slowly add the Tegosept and propionic acid.
7. Mix well and begin pouring vials.
